# Supplementary material for: “Hand down, Man down.” Analysis of Defensive Adjustments in Response to the Hot Hand in Basketball Using Novel Defense Metrics
Source: PLoS One. 2014 Dec 4;9(12):e114184. doi: 10.1371/journal.pone.0114184 (PMC4256225; doi:10.1371/journal.pone.0114184)
Supplement: Datasheet S4 — List of Players with 500 or More FGA. (XLSX) [file pone.0114184.s008.xlsx]

## Sheet: Tabelle1
Player	FGA
lebronjames	1304
kevindurant	1079
dwyanewade	1011
russellwestbrook	954
kobebryant	758
stephencurry	710
jamesharden	706
carmeloanthony	696
paulpierce	694
tonyparker	665
zachrandolph	663
kevingarnett	624
blakegriffin	611
timduncan	605
rudygay	586
chrispaul	602
chrisbosh	584
rajonrondo	580
mikeconley	568
andreiguodala	564
davidwest	557
marcgasol	543
jrueholiday	540
mariochalmers	536
jrsmith	513
paulgeorge	500
